# Supplementary material for: Comparative Proteomic Analyses Provide New Insights into Low Phosphorus Stress Responses in Maize Leaves
Source: PubMed Central journal article supplement (PMC4032345; doi:10.1371/journal.pone.0098215), 2014-05-23

## Supporting Information for Table 7: The MS/MS patterns of sequenced peptides

Spot number: **P4**

Protein name: **RuBisCO activase1**

gi|162458161

Sequenced peptide: **GLAYDISDDQDITR**

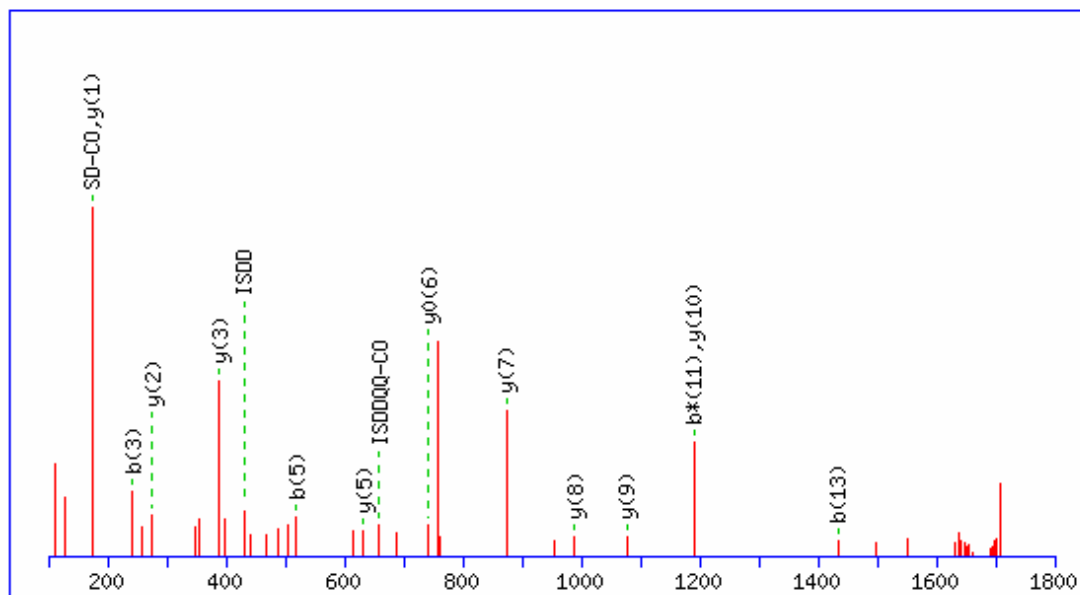

Spot number: **P7**

Protein name: **ATP synthase gamma chain**

gi|226533016

Sequenced peptide: **RPYIPLR**

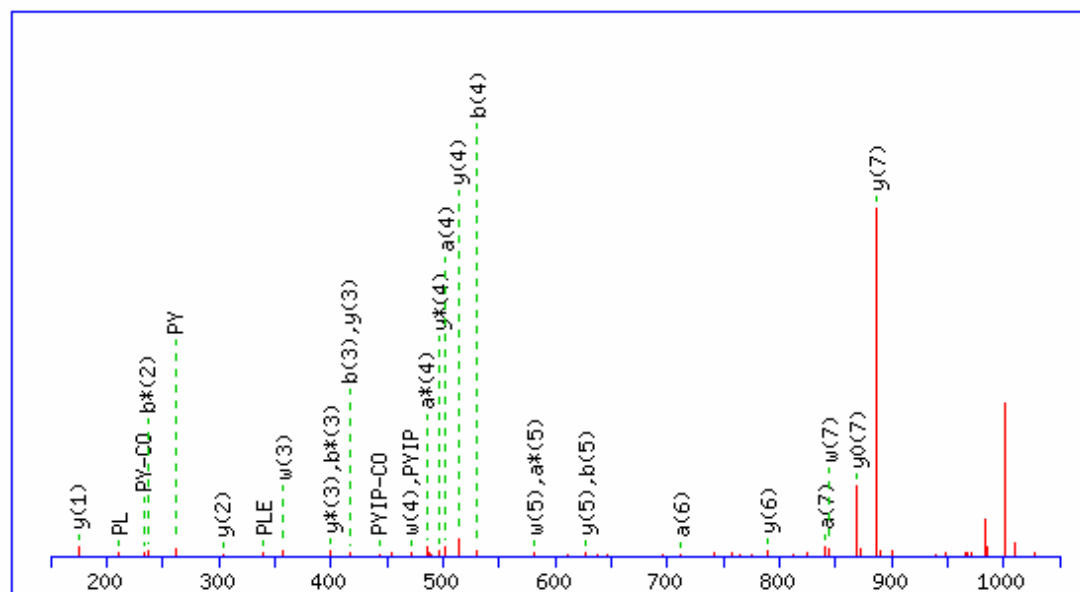

Spot number: **P11**

Protein name: **glutamine synthetase**

gi: |195619796

Sequenced peptide: **VIAEYIWVGGSGIDIR**

**HDLHISAYGEGNER**

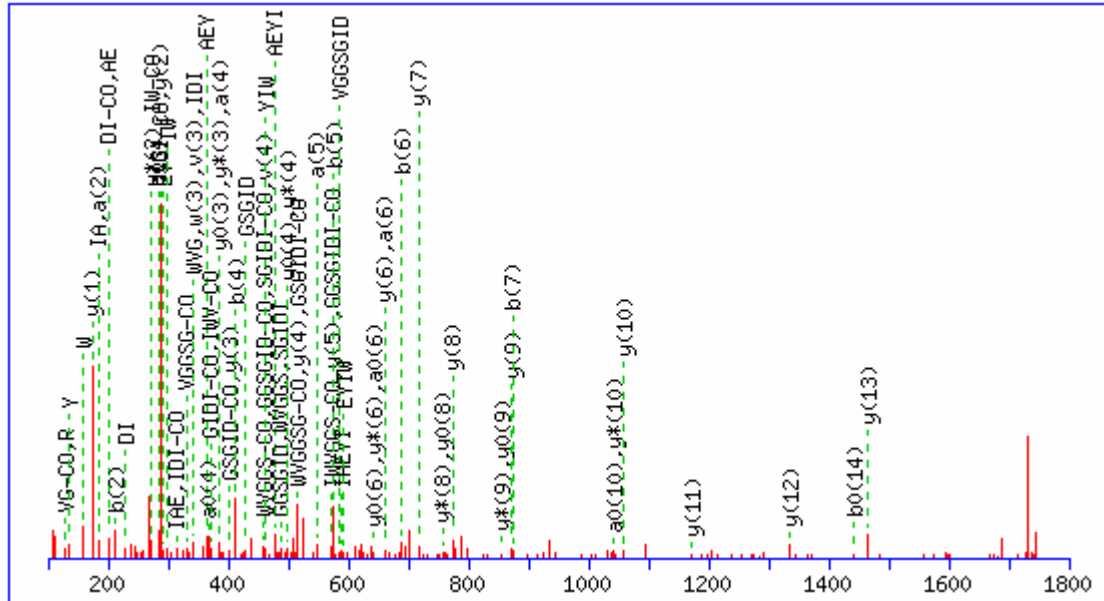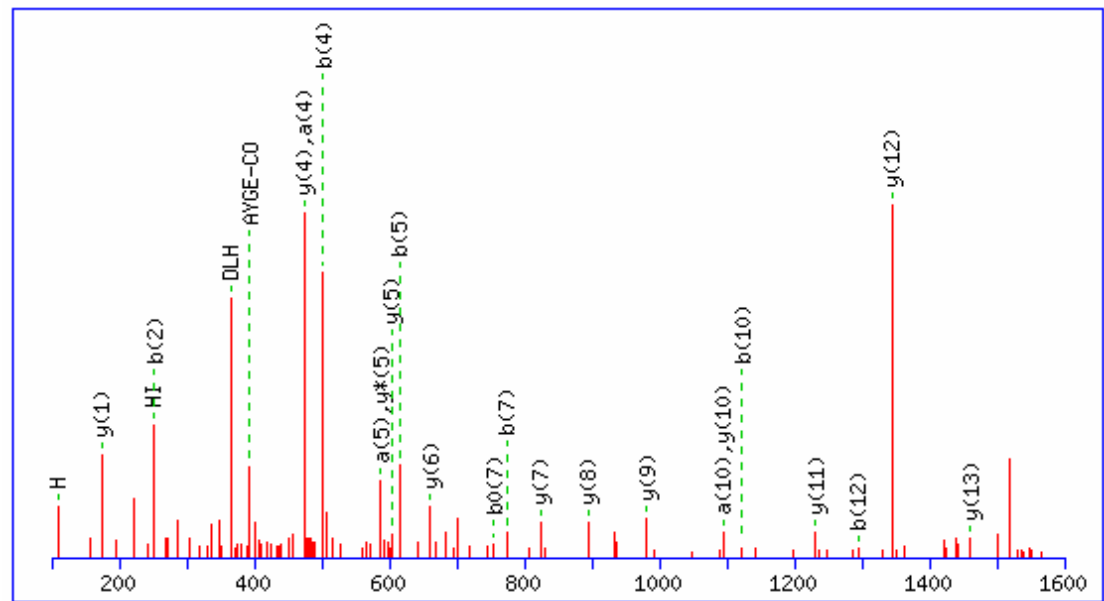

Spot number: **P12**

Protein name: **pyruvate,orthophosphate dikinase**

gi: **|168586**

Sequenced peptide: **FLDMFGNVVMDIPR**

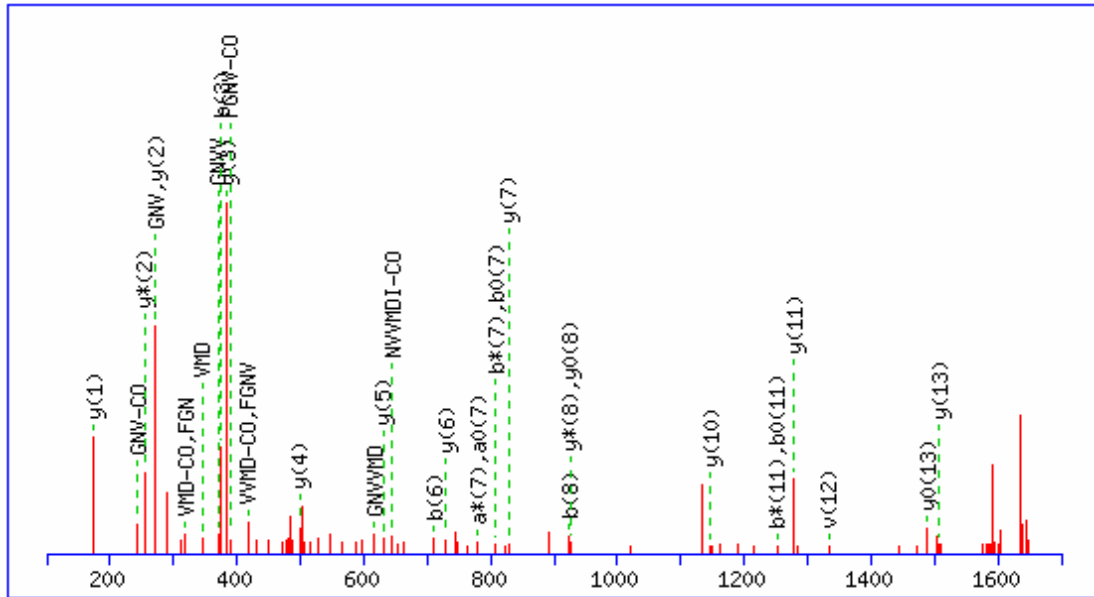

Spot number: **P30**

Protein name: **S-adenosylmethionine synthetase 1**

gi: **|194689980**

Sequenced peptide: **FVIGGPHGDAGLTGR**

**NIGFVSNDVGLDADHCK**

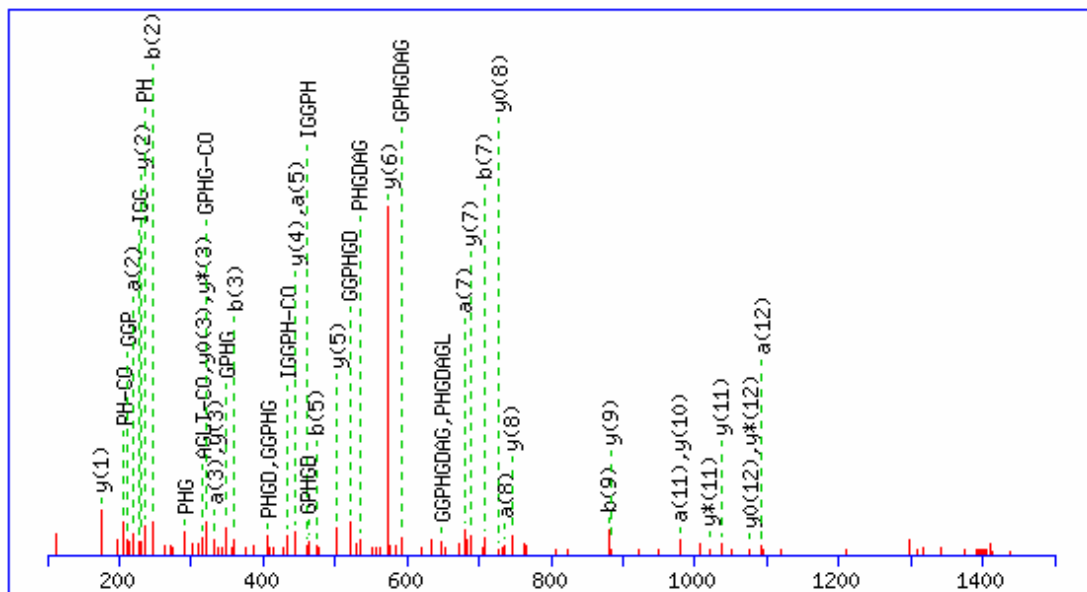

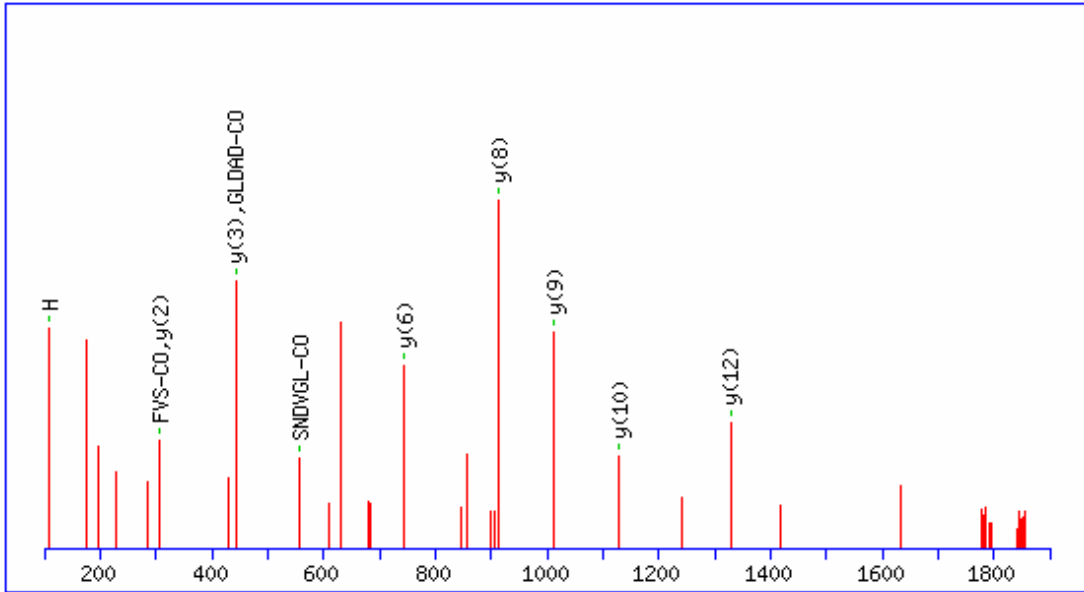

Spot number: **P36**

Protein name: **Rubisco large subunit-binding protein subunit alpha**

gi: **226493235**

Sequenced peptide: **EIAFDQGSR**

**AIELADPMENAGASLIR**

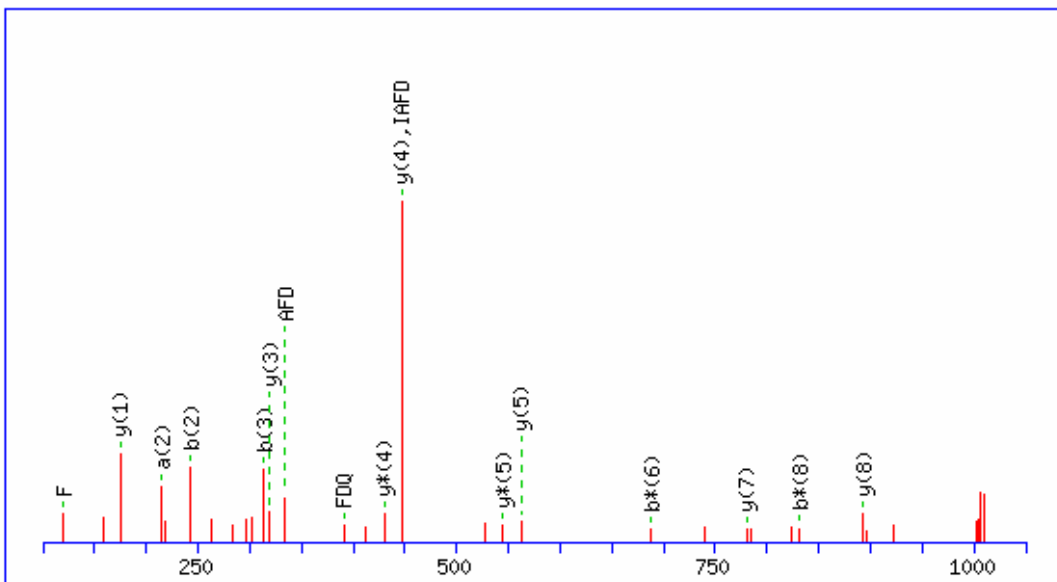

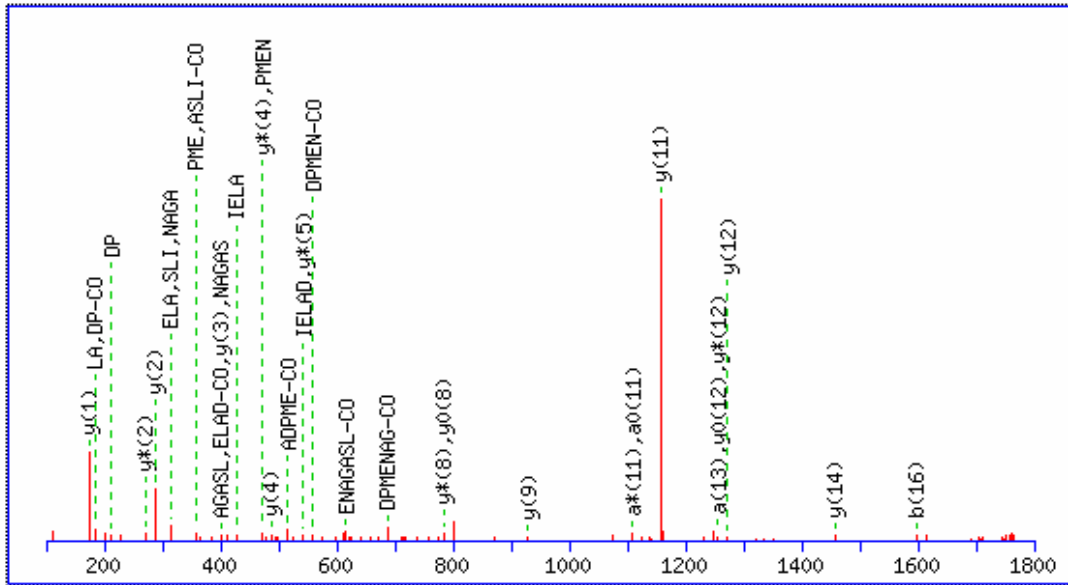

Spot number: **P41**

Protein name: **Hsp70**

gi: **20559**

Sequenced peptide: **TTPSYVGFDTER**

**NAVVTVPAYFNDSQR**

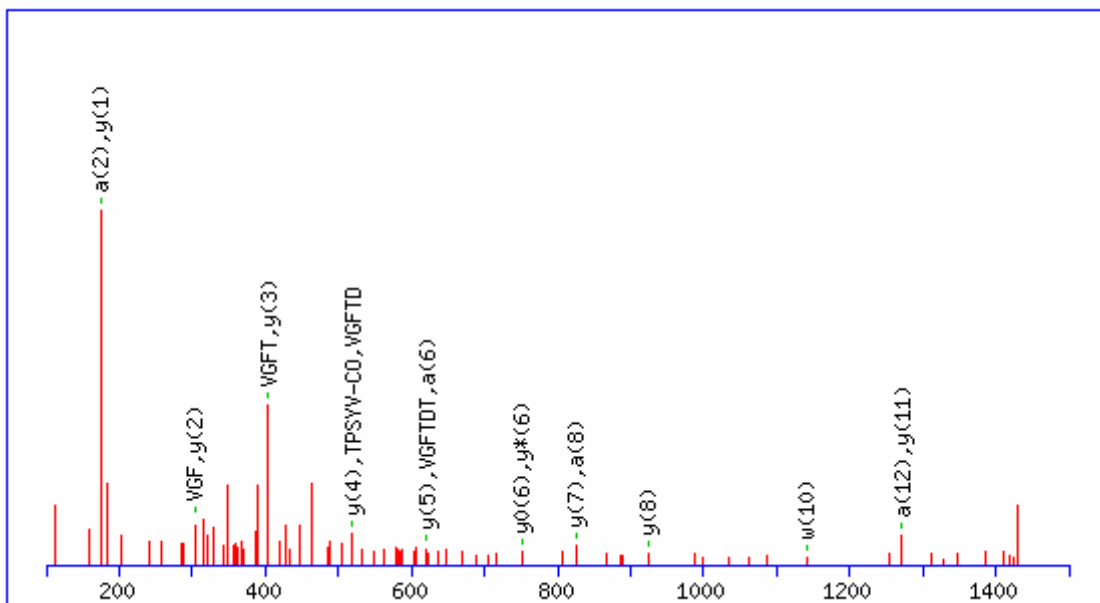

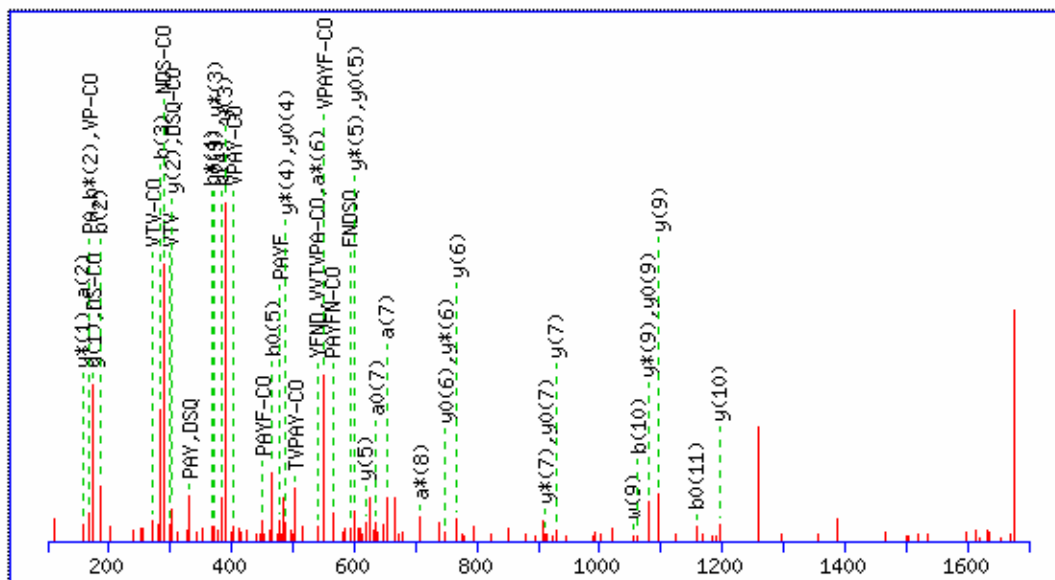

Spot number: **P54**

Protein name: **maize 20S proteasome alpha subunit**

gi: **|162463728**

Sequenced peptide: **HITIFSPEGR**

**CDPAGHFFGHK**

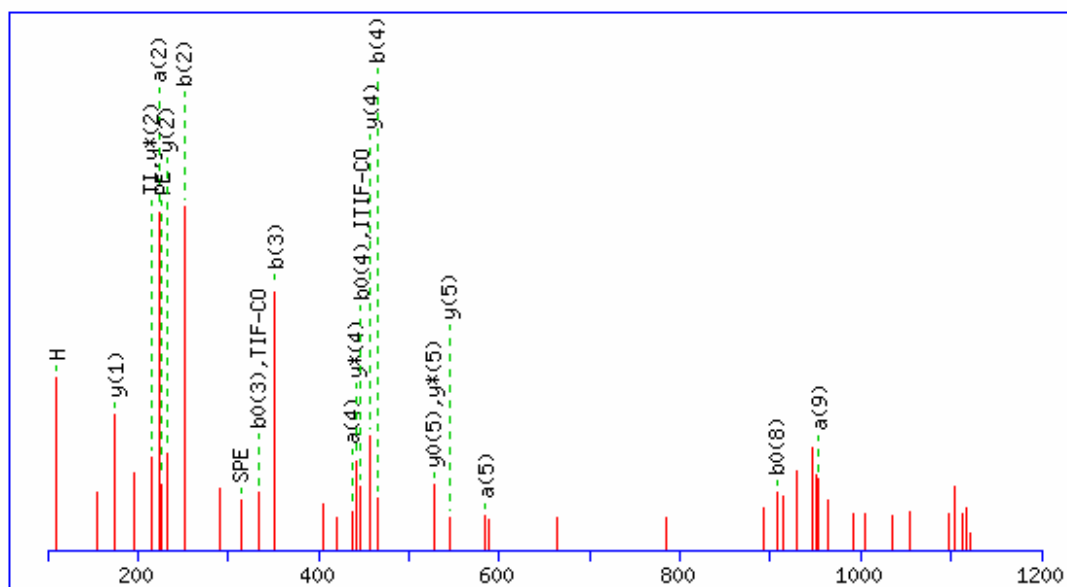

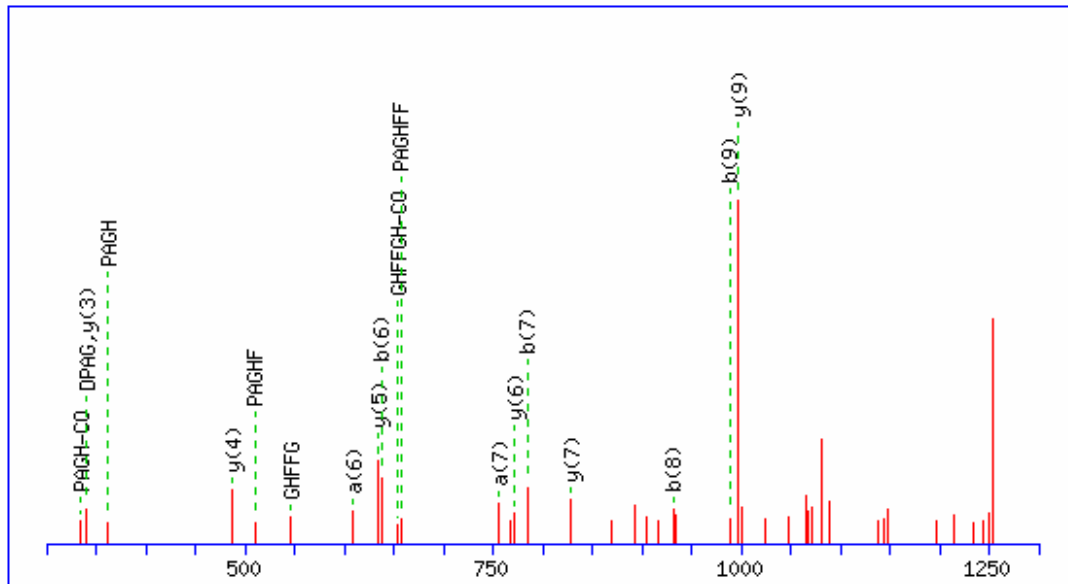

Spot number: **P57**

Protein name: **UDP-sulfoquinovose synthase**

gi: **|226530866**

Sequenced peptide: **ATDLNQGVVYGV**

**SFEPDAAVHFGEQR**

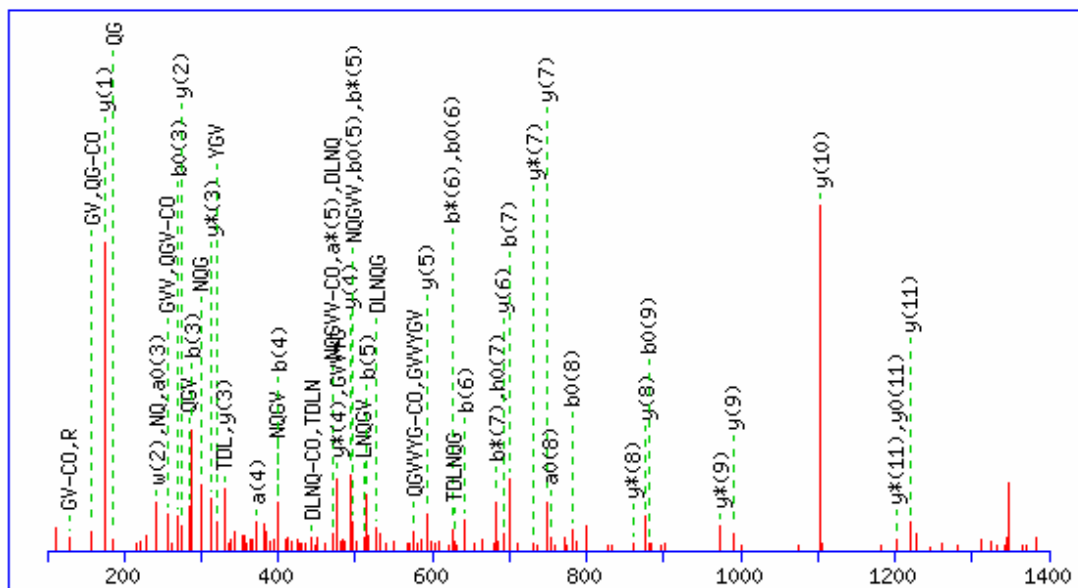

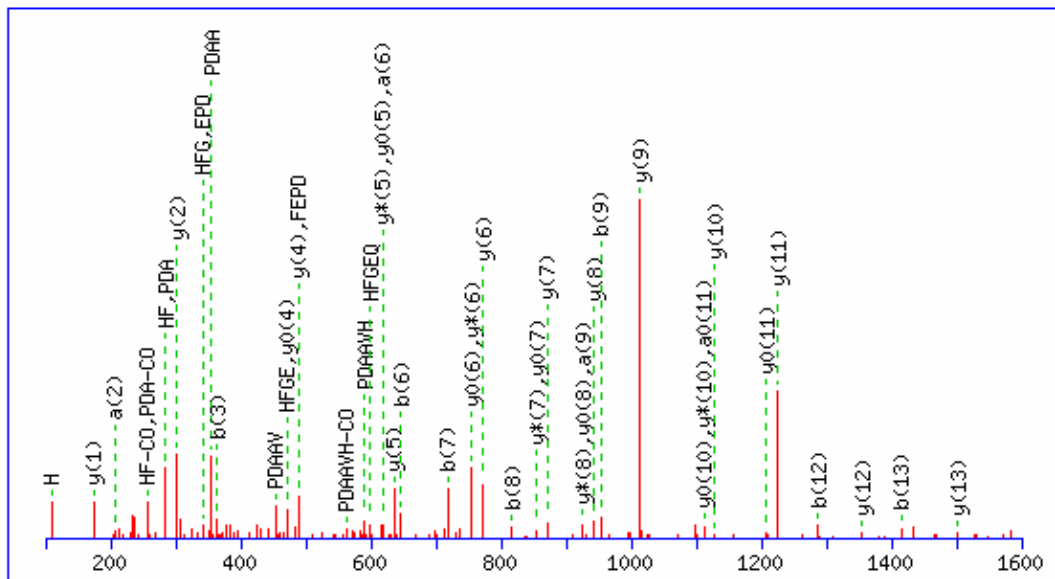

Spot number: **P63**

Protein name: **6-phosphogluconolactonase**

gi: **|224029461**

Sequenced peptide: **GAFTAVLSGGSLIEALR**

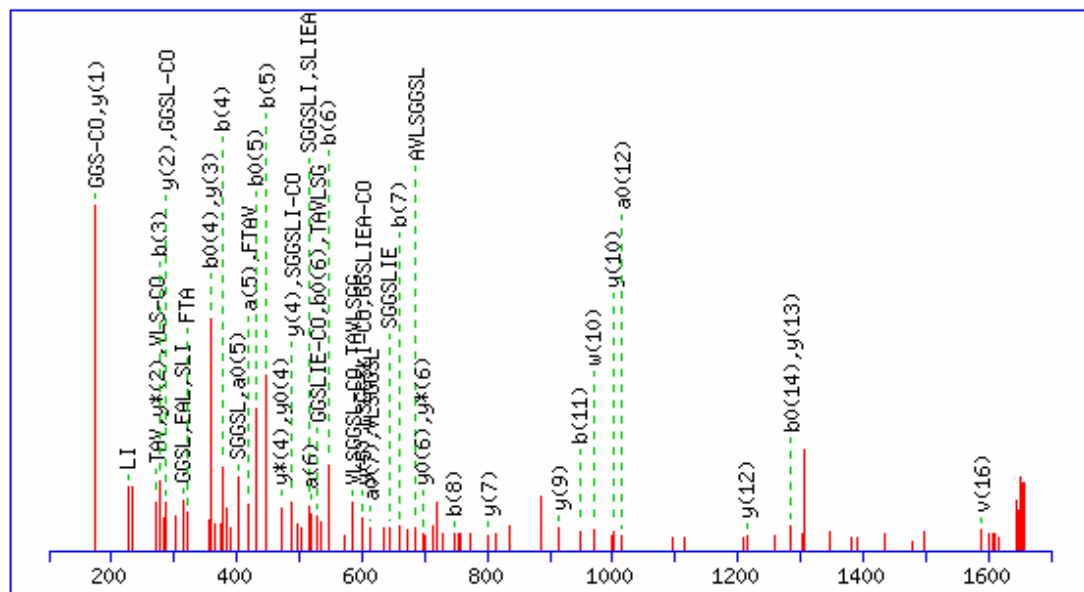



Spot number: **S8**

Protein name: **sucrose-phosphatase1**

gi: |162463022

Sequenced peptide: **CAAGIIQAIGHFK**

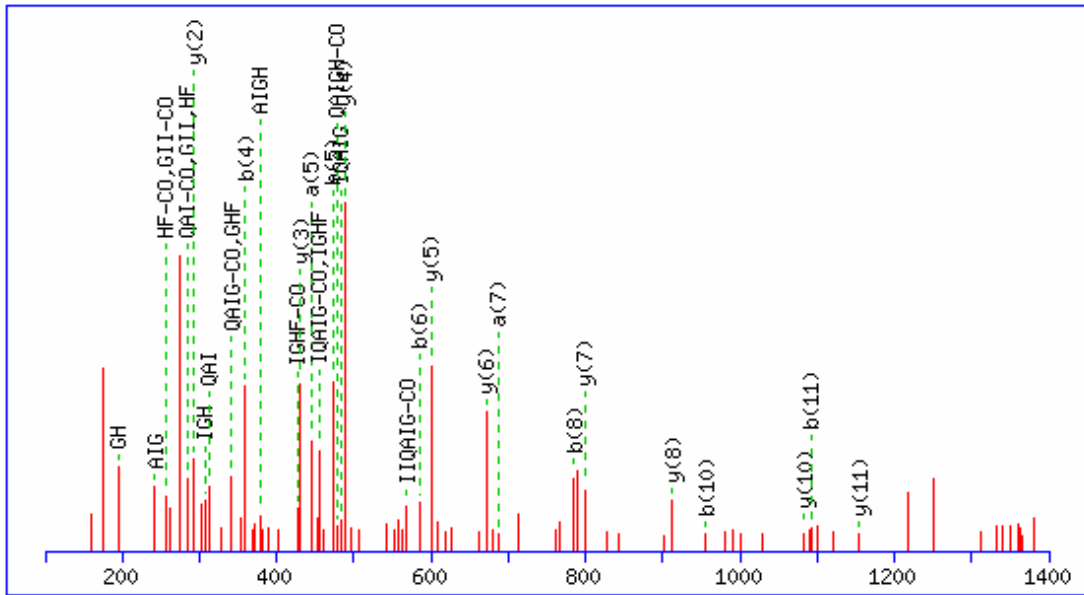

Spot number: **S10**

Protein name: **transketolase**

gi: |194708072

Sequenced peptide: **QKLPHLPGTSIEGVK**

**ISIEAGSTLGWQK**

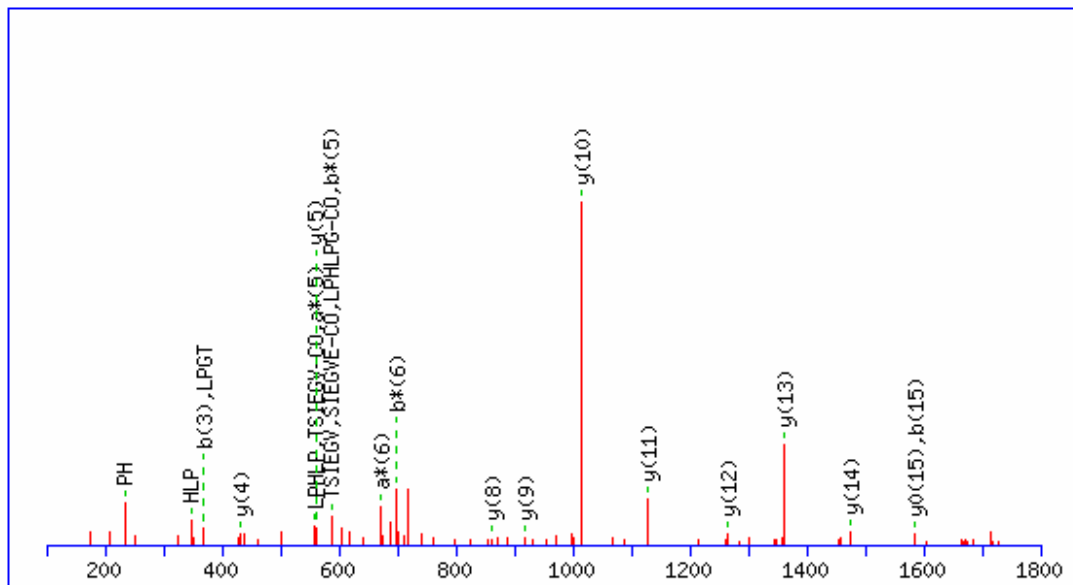

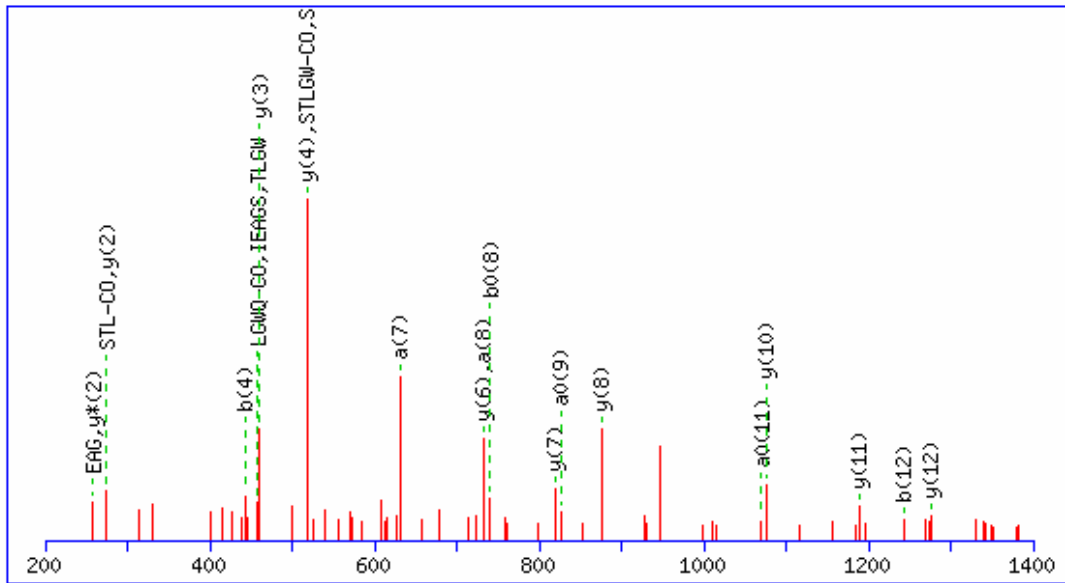

Spot number: **S21**

Protein name: **ACI14**

gi: **|195619258**

Sequenced peptide: **RVLDFLLALPTR**

**VLDFLLALPTR**

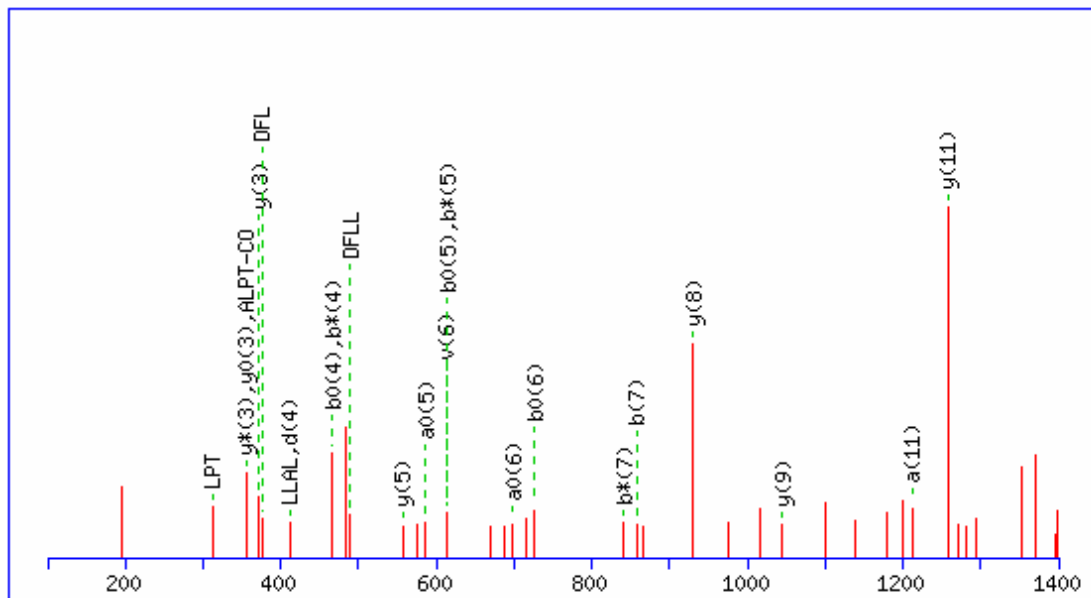

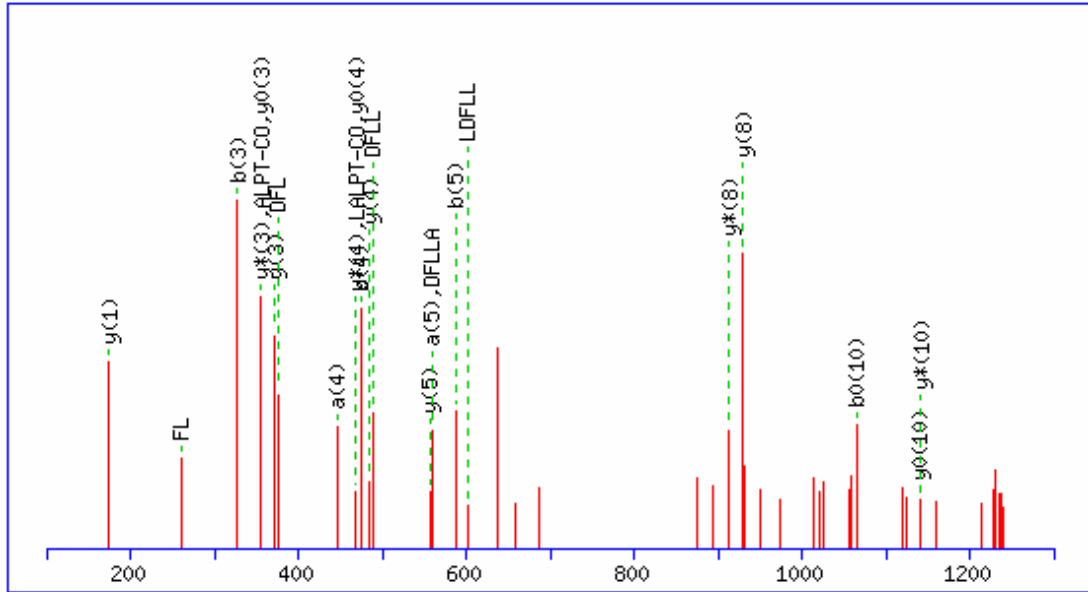

Spot number: **S51**

Protein name: **1-aminocyclopropane-1-carboxylate oxidase**

gi: **|195613470**

Sequenced peptide: **NFTMSEFYGTFFSR**

**AFNELPAHER**

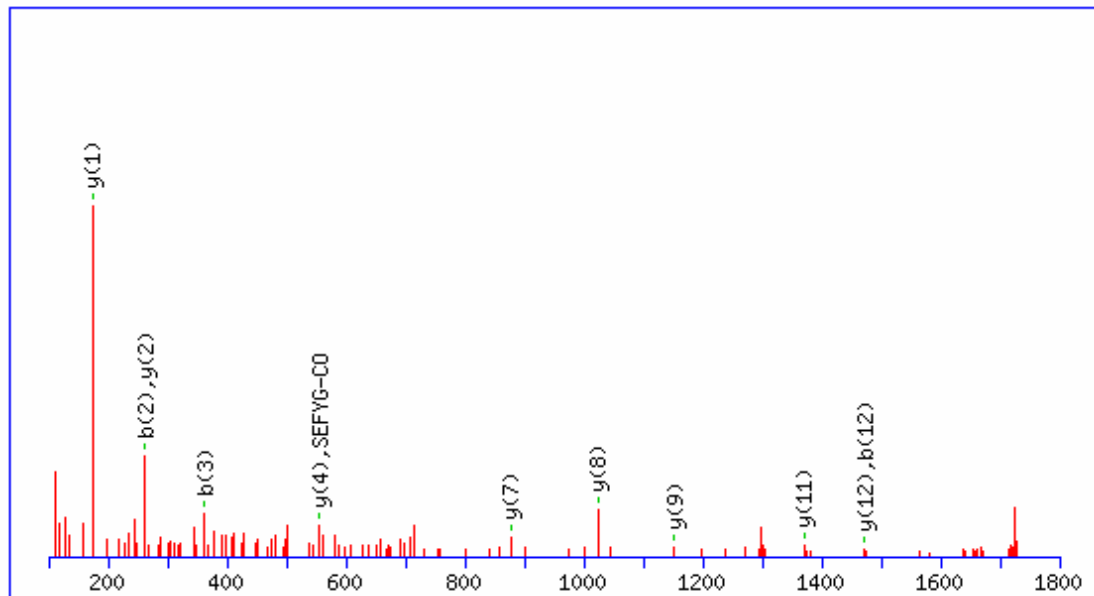

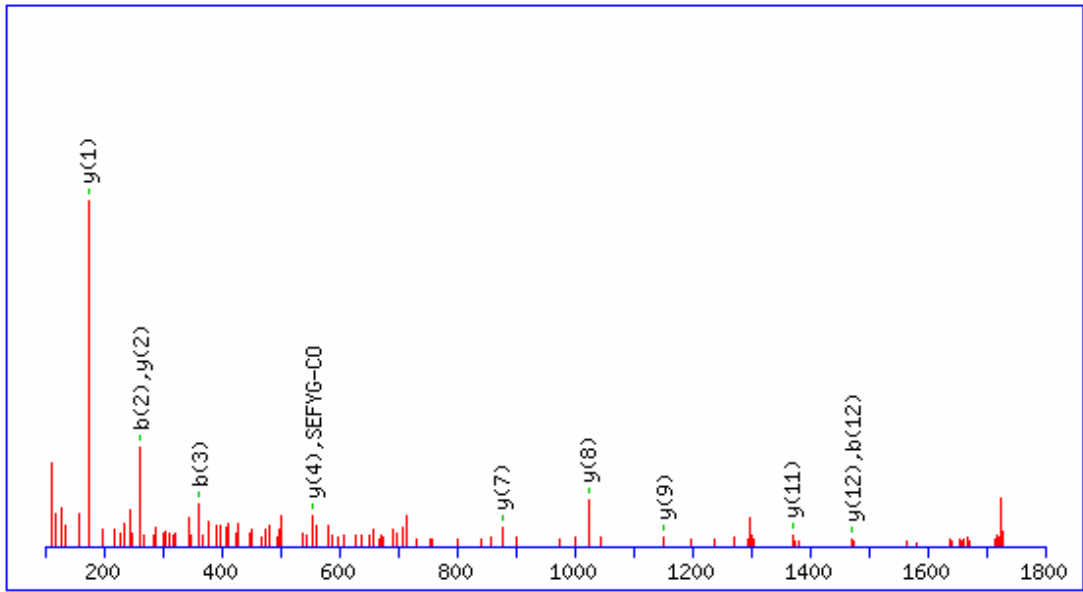

Supplement: pone.0098215.s002.pdf [file pone.0098215.s002.pdf]
